# Supplementary material
Source: Springer Nature journal article supplement (https://www.springermedizin.de/resource/supplementary/12936_2012_2607_MOESM1_ESM.pdf/9543306)

**a)** *An. arabiensis*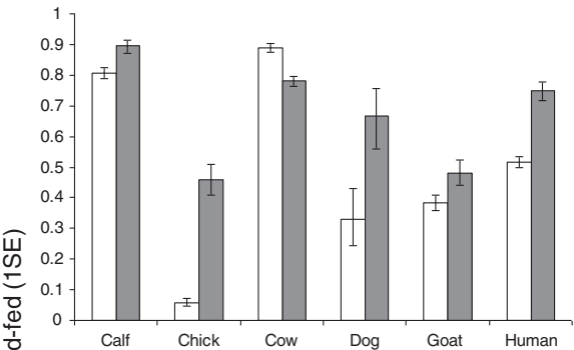*An. gambiae s.s.***b)**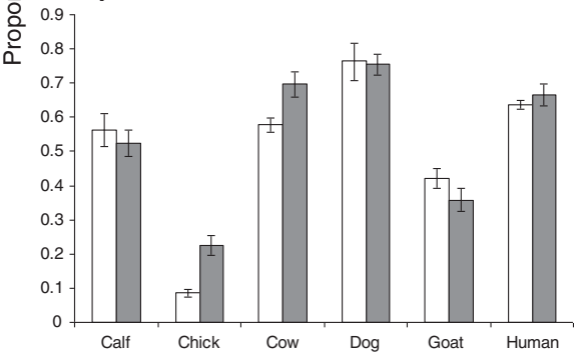

Supplement: MOESM1 [file 9543306]
